# Supplementary material for: Genomic distribution of SINEs in Entamoeba histolytica strains: implication for genotyping
Source: PubMed Central journal article supplement (PMC3716655; doi:10.1186/1471-2164-14-432), 2013-07-01
Supplement: 1471-2164-14-432-S2.pdf [file 1471-2164-14-432-S2.pdf]

**Table S1. Expected amplicon size with each primer pair from genome assemblies**

| Locus | Primers                   | Expected size (kb) |        |
|-------|---------------------------|--------------------|--------|
|       |                           | HM-1:IMSS          | Rahman |
| 13    | <b>13.1 F/13.2 R</b>      | 1.4                | 0.83   |
|       | <b>13.1 F/SINE R</b>      | 0.21               | -      |
|       | <b>13.1 F/13.1R</b>       | 1.1                | 0.42   |
| 17    | 17.1 F/17.1 R             | 2.53               | 2.0    |
|       | <b>17.2 F/17.2 R</b>      | 0.79               | 0.23   |
|       | <b>17.2 R/SINE R</b>      | 0.13               | -      |
| 19    | 19.1 F/ 19.1 R            | 2.1                | 1.55   |
|       | <b>19.3 F/19.3 R</b>      | 0.91               | 0.32   |
|       | <b>19.3 F/0.16 SINE F</b> | 0.66               | -      |
| 42    | 42.1 F/ 42.1 R            | 3.7                | 5.2    |
| 18    | 18 F/18 R                 | 0.96               | 0.24   |
| 50    | 50 F/50 R                 | 0.86               | 0.16   |

Primers not matching *E. dispar* are in boldface.
