# Supplementary material for: Genomic distribution of SINEs in Entamoeba histolytica strains: implication for genotyping
Source: PubMed Central journal article supplement (PMC3716655; doi:10.1186/1471-2164-14-432), 2013-07-01
Supplement: 1471-2164-14-432-S4.pdf [file 1471-2164-14-432-S4.pdf]

**Table S2. Detailed analysis of loci 13, 17, 19 42, 18 and 50 in sequenced strains (AmoebaDB).**

| Eh strain | locus              | ID                                                                     | SINE occupancy | start  | End    | Remarks                                                          |
|-----------|--------------------|------------------------------------------------------------------------|----------------|--------|--------|------------------------------------------------------------------|
| DS4       | 13                 | <a href="#">EHDS4_4213</a>                                             | +              | 84933  | 85542  |                                                                  |
|           | 17                 | <a href="#">EHDS4_2840</a>                                             | +              | 84936  | 85541  |                                                                  |
|           | 19                 | <a href="#">EHDS4_3346</a>                                             | +              | 26367  | 26920  |                                                                  |
|           | 42                 | <a href="#">EHDS4_3522</a>                                             | +              | 21707  | 21978  | Truncated (271 bp of EhSINE1)                                    |
|           | SINE2              |                                                                        |                |        |        |                                                                  |
|           | 18                 | EHDS4_4206                                                             | +              | 1601   | 2278   |                                                                  |
| HMI:CA    | 50                 | EHDS4_3252                                                             | +              | 145133 | 145728 | Eh SINE2 slightly truncated from both sides                      |
|           | 13                 | <a href="#">EHHM1_CA_4213</a>                                          | +              | 79360  | 79884  | 100 bp deletion within EhSINE1                                   |
|           | 17                 | <a href="#">EHHM1_CA_2840</a>                                          | +              | 13367  | 13921  |                                                                  |
|           | 19                 | <a href="#">EHHM1_CA_3346</a>                                          | +              | 22600  | 23100  |                                                                  |
|           | 42                 | <a href="#">EHHM1_CA_3522</a>                                          | +              | 25911  | 26448  | 30 bp deletion within EhSINE1 at 3' end                          |
|           | SINE2              |                                                                        |                |        |        |                                                                  |
| KU27      | 18                 | EHHM1_CA_4206                                                          | +              | 1570   | 2251   |                                                                  |
|           | 50                 | EHHM1_CA_3252                                                          | +              | 136204 | 136749 | Deletion from within EhSINE2 (414-532)                           |
|           | 13                 | <a href="#">EHKU27_4213</a>                                            | +              | 84501  | 85105  |                                                                  |
|           | 17                 | <a href="#">EHKU27_2840</a>                                            | +              | 14648  | 14878  | Truncated from 5' end (230 bp of EhSINE1)                        |
|           | 19                 | <a href="#">EHKU27_3346</a>                                            | +              | 26048  | 26601  |                                                                  |
|           | 42                 | <a href="#">EHKU27_3522</a>                                            | +              | 20600  | 21115  | EhSINE1 slightly truncated from 5' end                           |
| KU48      | SINE2              |                                                                        |                |        |        |                                                                  |
|           | 18                 | EHKU27_4206                                                            | +              | 1588   | 2240   | Small (20bp) deletion within EhSINE2 (3 IR instead of 4 IR)      |
|           | 50                 | EHKU27_3252                                                            | +              | 145081 | 145650 | Truncation from 5' end and 13 bp deletion within EhSINE2         |
|           | 13                 | <a href="#">EHKU48_4213</a>                                            | +              | 72608  | 73198  | 40 bp deletion within EhSINE1                                    |
|           | 17                 | <a href="#">EHKU48_2840</a>                                            | +              | 13293  | 13847  |                                                                  |
|           | 19                 | <a href="#">EHKU48_3346</a>                                            | +              | 17941  | 18501  |                                                                  |
| KU50      | 42                 | <a href="#">EHKU48_3522</a>                                            | +              | 21600  | 22120  |                                                                  |
|           | SINE2              |                                                                        |                |        |        |                                                                  |
|           | 18                 | EHKU48_4206                                                            | -              | NA     | NA     |                                                                  |
|           | 50                 | EHKU48_3252                                                            | +              | 125979 | 126087 | Only 109 bp of EhSINE2 present                                   |
|           | 13                 | <a href="#">EHKU50_4213</a>                                            | +              | 47531  | 48136  | Slightly truncated from 5' end and 10 bp deletion within EhSINE1 |
|           | 17                 | <a href="#">EHKU50_2840</a>                                            | +              | 4860   | 5439   | Truncation from 3' end of EhSINE1                                |
| MS96      | 19                 | <a href="#">EHKU50_3346</a>                                            | -              | 7929   | 7885   | Only 40 bp of EhSINE1 present                                    |
|           | 42                 | <a href="#">EHKU50_3522</a>                                            | +              | 11229  | 11469  | EhSINE1 truncated from both side (240 bp of EhSINE1 present)     |
|           | SINE2              |                                                                        |                |        |        |                                                                  |
|           | 18                 | EHKU50_4206                                                            | -              | NA     | NA     |                                                                  |
|           | 50                 | EHKU50_3252                                                            | +              | 145787 | 146189 | Truncated from 5' end of EhSINE1                                 |
|           | 13                 | <a href="#">EHMS96_4213</a>                                            | -              | 82910  | 82990  | Only 80 bp of EhSINE1 present                                    |
| Rahman    | 17                 | <a href="#">EHMS96_2840</a>                                            | +              | 14705  | 14308  | Truncated from both side (397 bp of EhSINE1 present)             |
|           | 19                 | <a href="#">EHMS96_3346</a>                                            | +              | 26383  | 26937  |                                                                  |
|           | 42                 | <a href="#">EHMS96_3522</a>                                            | +              | 24410  | 24950  | EhSINE1 slightly truncated at 5' end                             |
|           | SINE2              |                                                                        |                |        |        |                                                                  |
|           | 18                 | EHMS96_4206                                                            | +              | 1615   | 2236   | Slight (37 bp) deletion within EhSINE2                           |
|           | 50                 | EHMS96_3252                                                            | -              | NA     | NA     |                                                                  |
| Rahman    | 13                 | EhRm Scaffold01127                                                     | -              | NA     | NA     |                                                                  |
|           | 17                 | <a href="#">EhRm_scaffold00561</a>                                     | -              | 29831  | 29913  | Only 90 bp EhSINE1 present                                       |
|           | 19                 | <a href="#">EhRm_scaffold00536</a><br><a href="#">EhRm_contig21711</a> | -              | NA     | NA     |                                                                  |
|           | 42                 | <a href="#">EhRm_scaffold00892</a>                                     | -              | NA     | NA     |                                                                  |
|           | SINE2              |                                                                        |                |        |        |                                                                  |
|           | 18                 | EhRm_scaffold00754                                                     | -              | NA     | NA     |                                                                  |
| 50        | EhRm_scaffold00159 | -                                                                      | NA             | NA     |        |                                                                  |

Scaffolds/Contigs shaded in yellow represent poor assembly (having gaps). SINE elements of <100 bp are considered to be negative (-) occupancy. NA- not applied. As mentioned in the text and figure 5 assembly of Rahman sequence at the SINE region is erroneous in the database. In fact the entire EhSINE1 sequence is missing in Rahman.
