# Supplementary material for: Genomic distribution of SINEs in Entamoeba histolytica strains: implication for genotyping
Source: PubMed Central journal article supplement (PMC3716655; doi:10.1186/1471-2164-14-432), 2013-07-01
Supplement: 1471-2164-14-432-S5.pdf [file 1471-2164-14-432-S5.pdf]

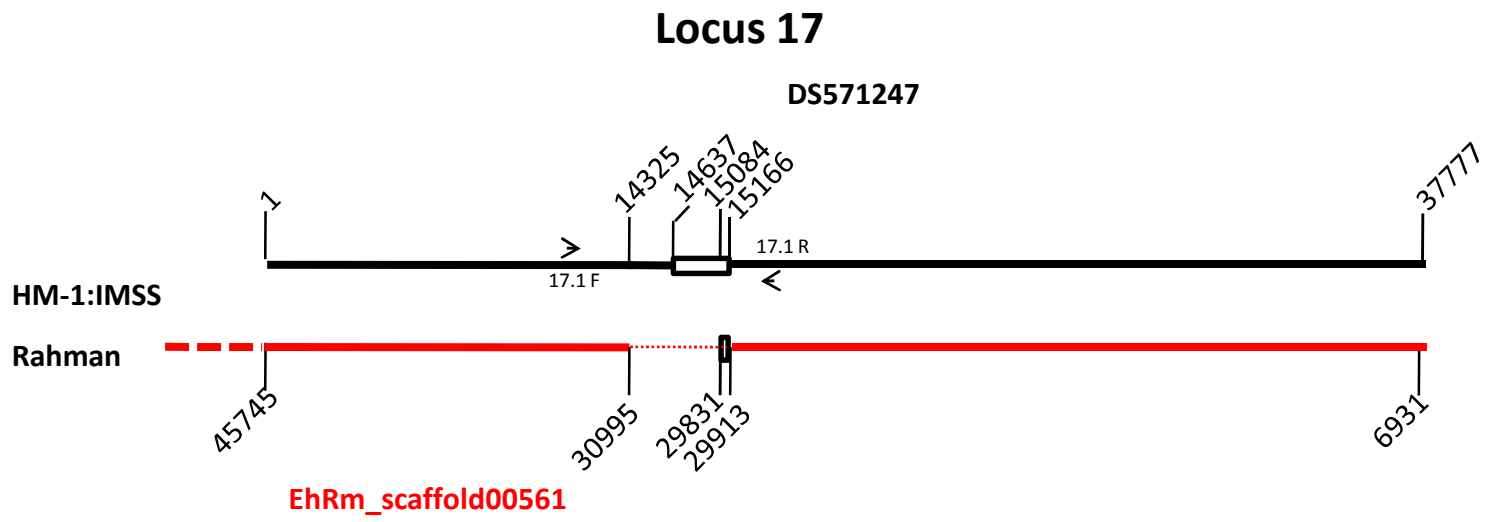

Figure S4
