# Supplementary material for: Genomic distribution of SINEs in Entamoeba histolytica strains: implication for genotyping
Source: PubMed Central journal article supplement (PMC3716655; doi:10.1186/1471-2164-14-432), 2013-07-01
Supplement: 1471-2164-14-432-S8.pdf [file 1471-2164-14-432-S8.pdf]

**Table S3. List of xenic isolates**

| <b>Lab Number</b> | <b>Sex</b> | <b>Diagnosis</b> | <b>Country</b> | <b>Continent</b> |
|-------------------|------------|------------------|----------------|------------------|
| 25591             | M          | liver abscess    | unknown        | South America    |
| 26825             | F          | diarrhea         | Rwanda/Congo   | Africa           |
| 27749             | F          | unknown          | Tibet/Nepal    | Asia             |
| 28577             | F          | dysentery        | Guinea         | Africa           |
| 30325             | M          | diarrhea         | Indonesia      | Asia             |
| 32083             | M          | liver abscess    | Nigeria        | Africa           |
| 32223             | M          | liver abscess    | Indonesia      | Asia             |
| 32257             | F          | no symptoms      | Bangladesh     | Asia             |
| 33526             | M          | liver abscess    | El Salvador    | South America    |
| 34153             | unknown    | unknown          | unknown        | unknown          |
| 34180             | F          | unknown          | unknown        | unknown          |
| 34276             | M          | unknown          | unknown        | unknown          |
| 581               | F          | unknown          | India          | Asia             |
| 654               | M          | unknown          | India          | Asia             |
| 812               | F          | unknown          | India          | Asia             |
| 878               | M          | unknown          | India          | Asia             |

Likely geographic source and the clinical diagnosis of the patient from which the *E. histolytica* were isolated.
